# Supplementary material
Source: PubMed Central journal article supplement (PMC8896310)

# Figure S1

**A**

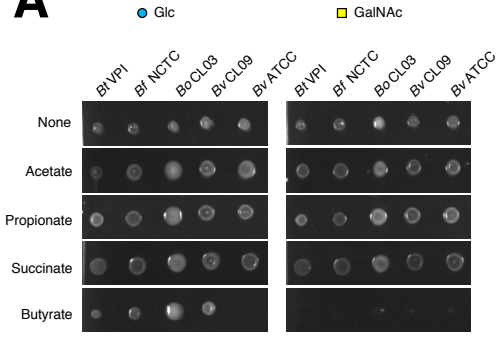

**B**

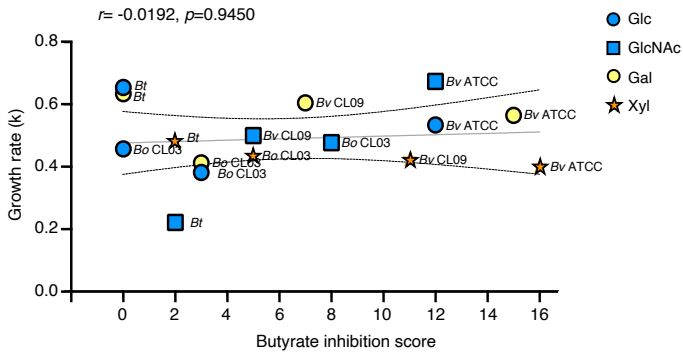

**C**

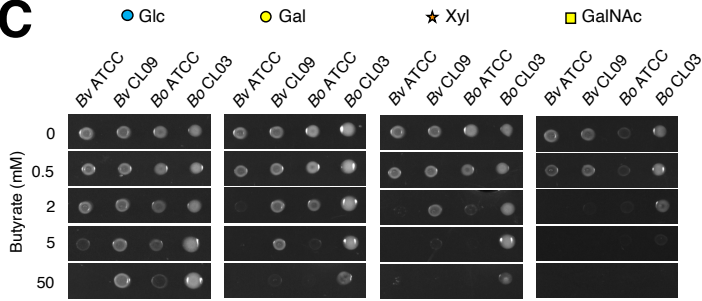

**D**

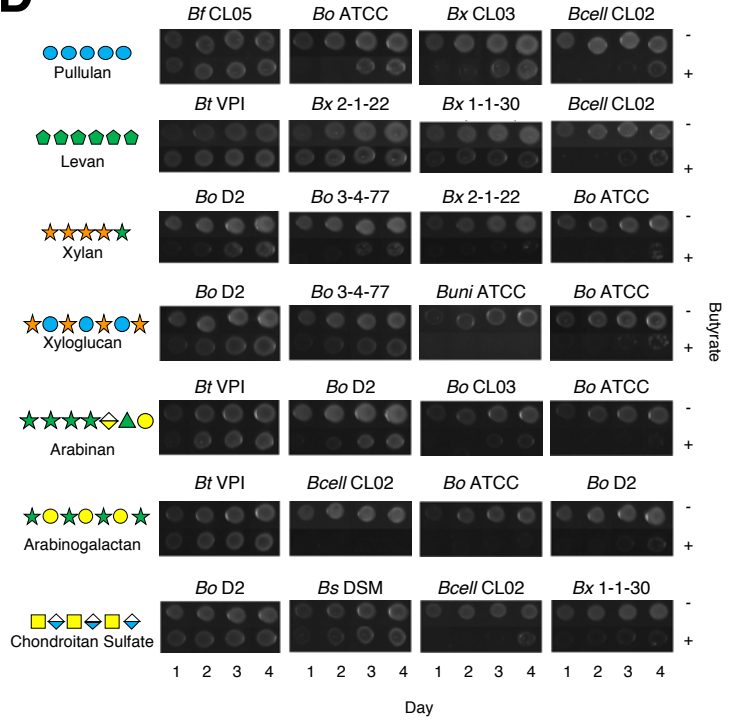

**E**

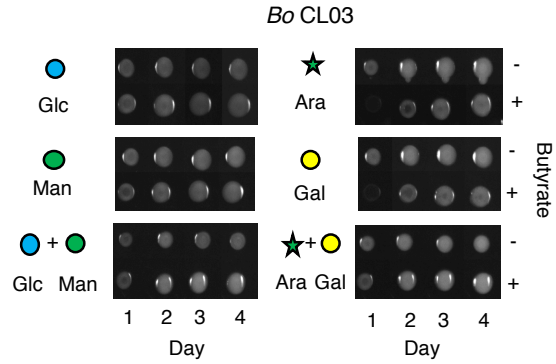

Supplement: NIHMS1774407-supplement-1.pdf [file NIHMS1774407-supplement-1.pdf]

# Figure S2

**A**

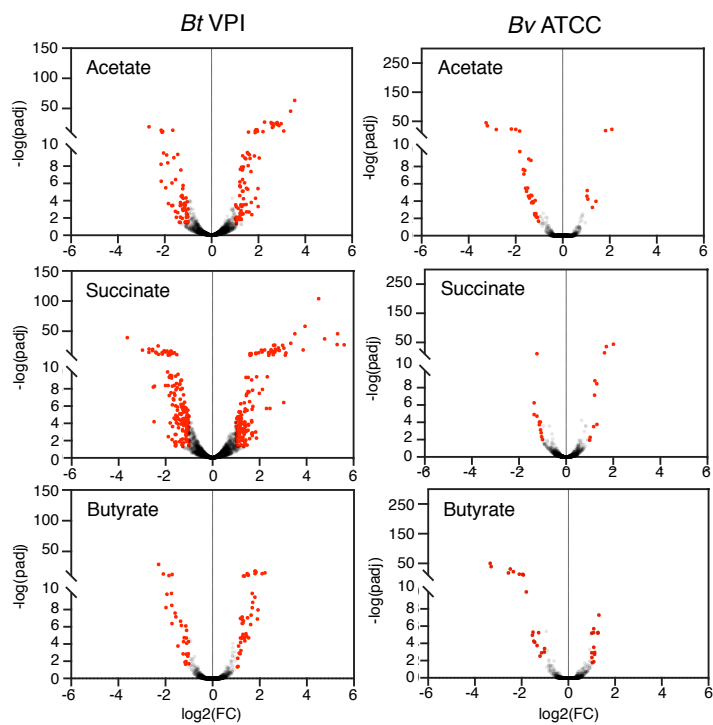

**B**

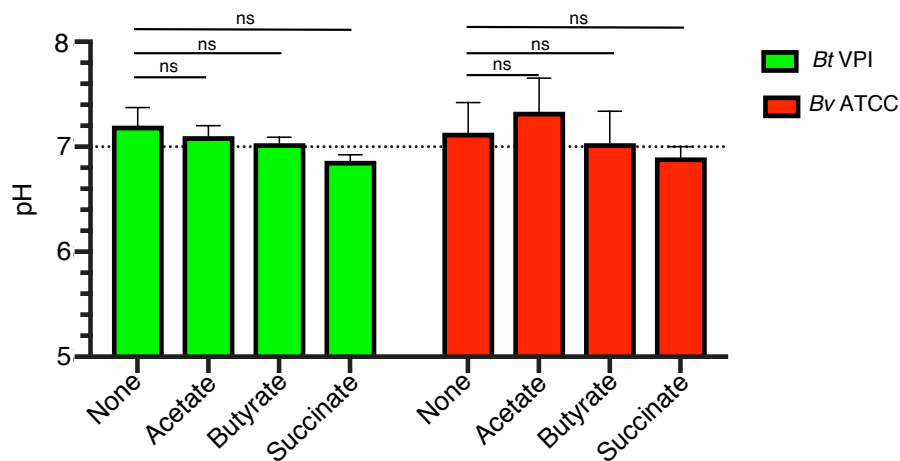

**C**

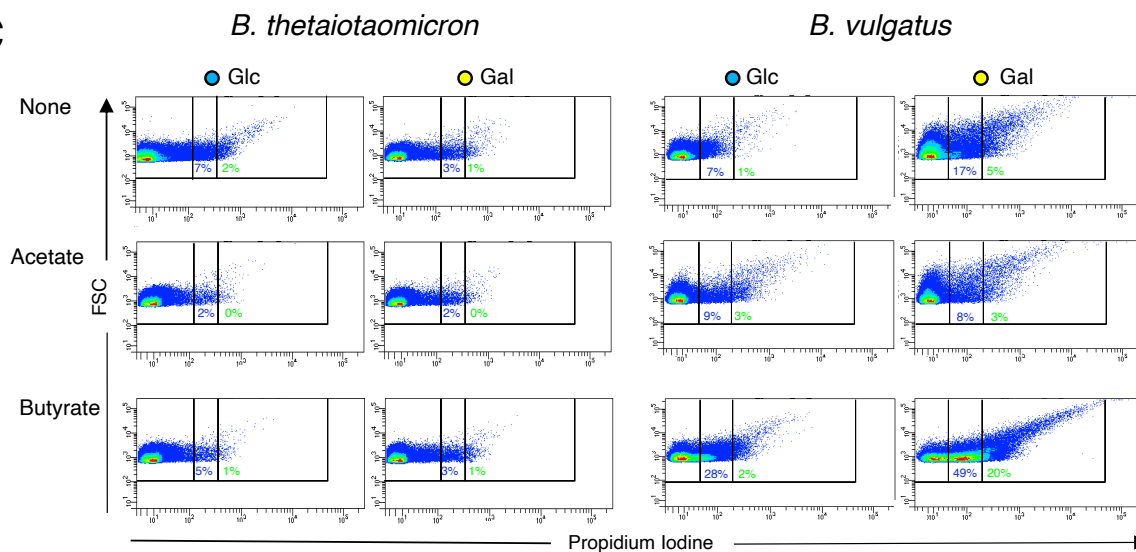

Supplement: NIHMS1774407-supplement-2.pdf [file NIHMS1774407-supplement-2.pdf]

# Figure S5

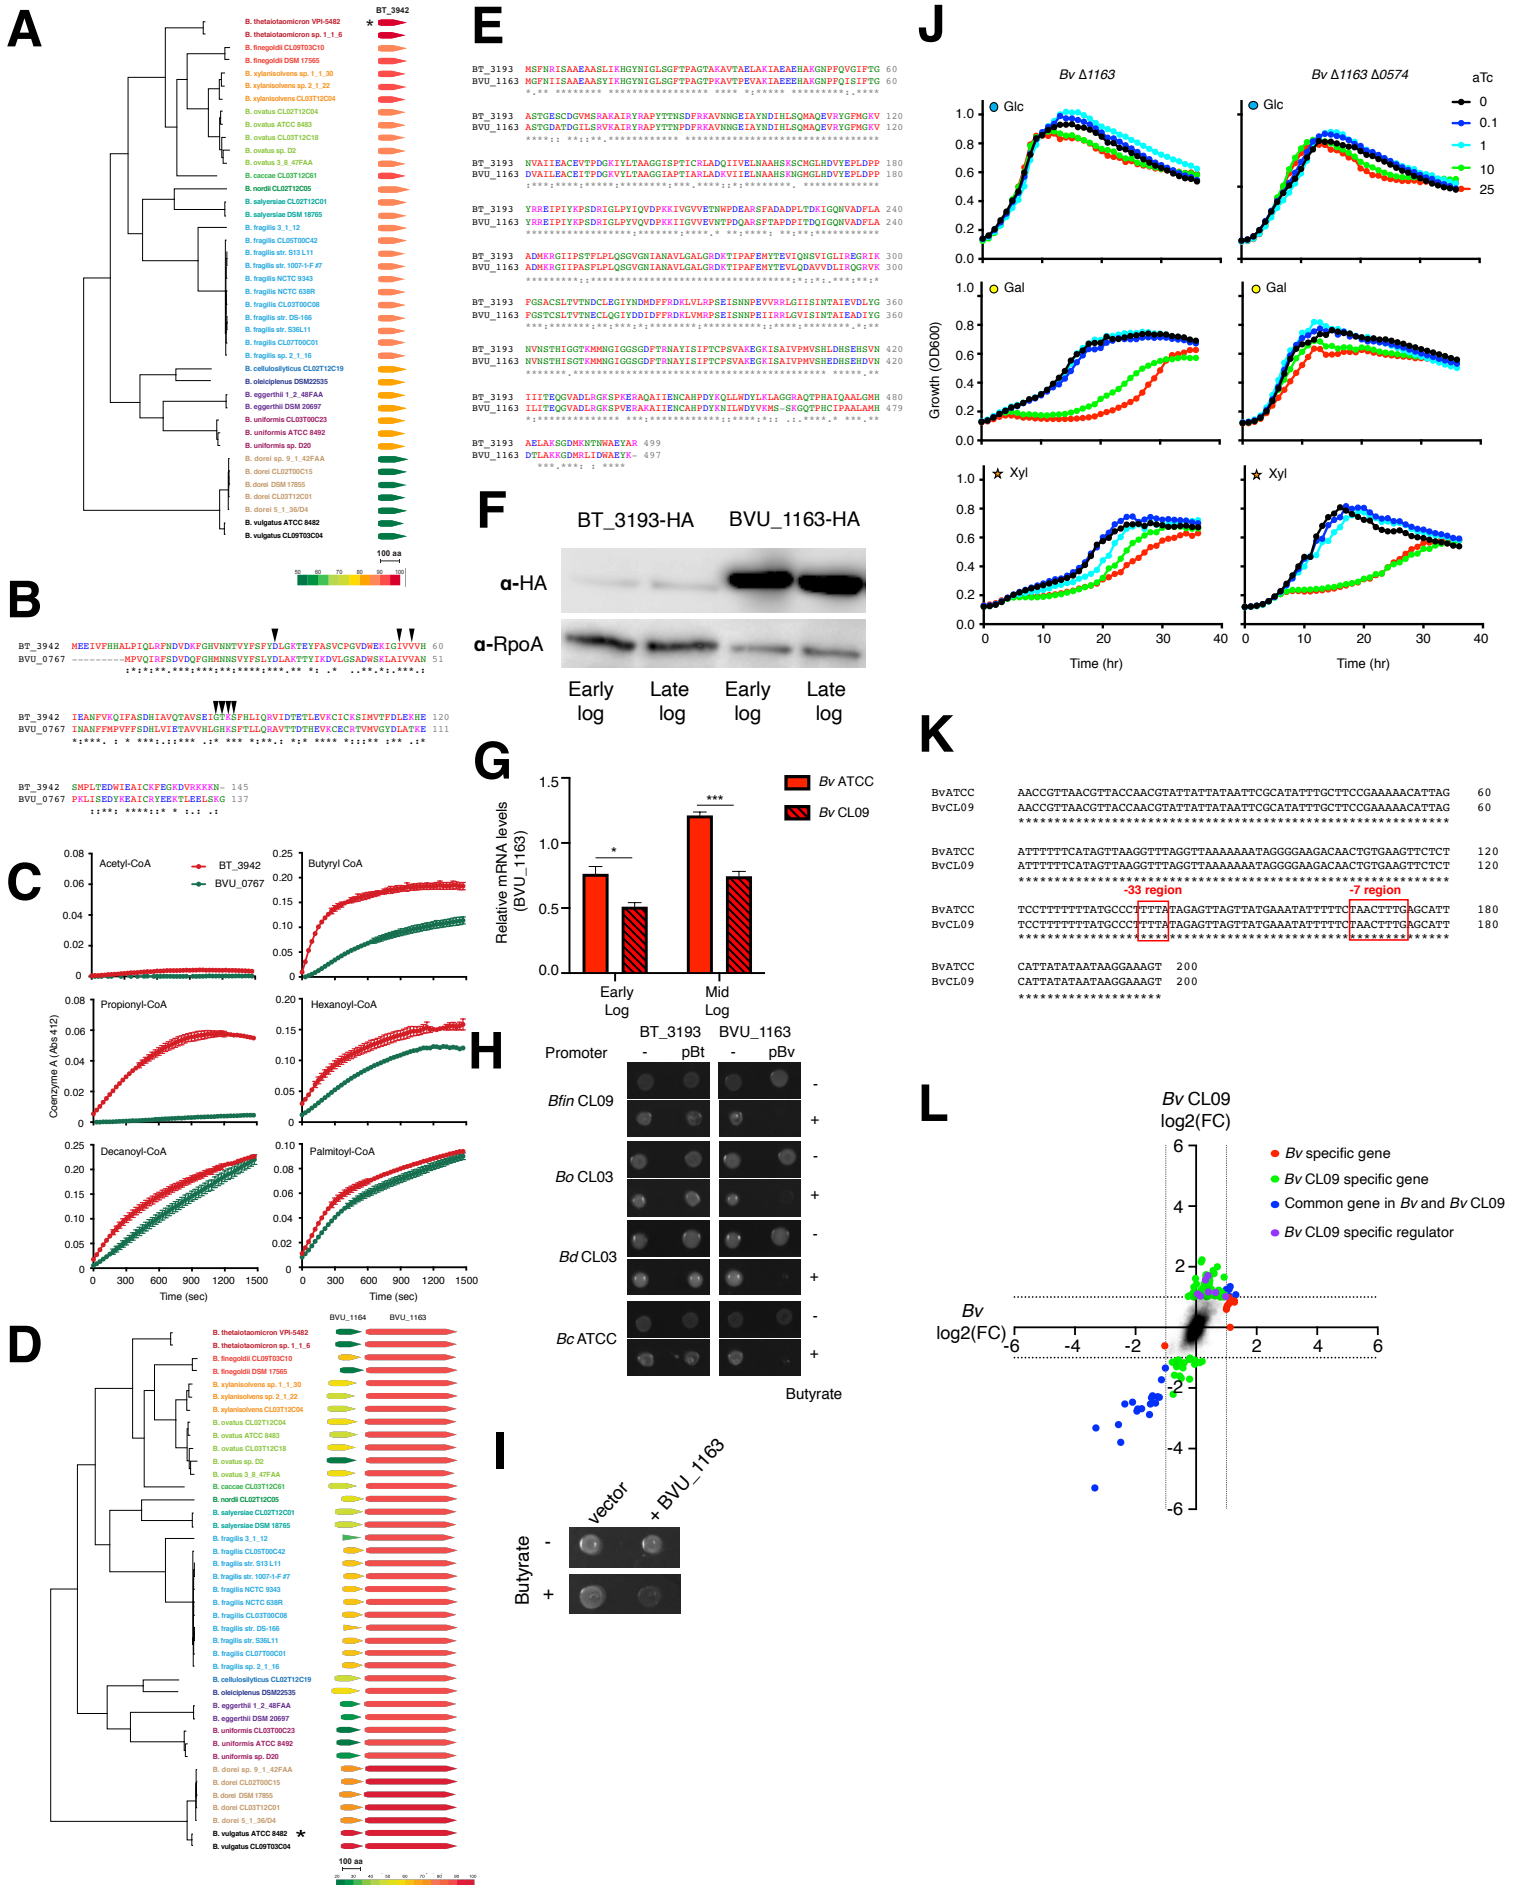

Supplement: NIHMS1774407-supplement-5.pdf [file NIHMS1774407-supplement-5.pdf]
